# Supplementary material
Source: Royal Society of Chemistry journal article supplement (https://www.rsc.org/suppdata/p2/1999/1669/903123e.doc)
Supplement: Supplementary file 1 [file 903123e.doc]

Table 9

Absorbance data for 2,4-dinitrophenol (4 10–5 mol dm–3) in DMSO containing *N*-methylaniline and its hydrochloride salt at 25°C.

| [An]/mol dm–3 | [AnH+]/mol dm–3 | Abs (430 nm) | K4b |
| --- | --- | --- | --- |
| 0.00 | 0.008 | 0.008 | - |
| 0.10 | 0.008 | 0.068 | 0.0064 |
| 0.20 | 0.008 | 0.117 | 0.0062 |
| 0.30 | 0.008 | 0.160 | 0.0061 |
| 0.40 | 0.008 | 0.203 | 0.0063 |
| 0.50 | 0.008 | 0.248 | 0.0067 |
| 0.60 | 0.008 | 0.282 | 0.0068 |
| 0.70 | 0.008 | 0.318 | 0.0071 |
| 0.80 | 0.008 | 0.349 | 0.0072 |
| 0.00a | 0.00 | 0.82 | - |

a. Made alkaline with sodium hydroxide.

b. Calculated as .

Table 10

Absorbance data for 2,4-dinitrophenol (4 10–5 mol dm–3) in DMSO containing *N,N*-dimethylaniline and its hydrochloride salt at 25°C.

| [An]/mol dm–3 | [AnH+]/mol dm–3 | Abs (430 nm) | K4b |
| --- | --- | --- | --- |
| 0.00 | 0.001 | 0.006 | - |
| 0.10 | 0.001 | 0.230 | 0.0038 |
| 0.20 | 0.001 | 0.333 | 0.0034 |
| 0.30 | 0.001 | 0.423 | 0.0035 |
| 0.40 | 0.001 | 0.510 | 0.0041 |
| 0.50 | 0.001 | 0.545 | 0.0039 |
| 0.60 | 0.001 | 0.590 | 0.0042 |
| 0.70 | 0.001 | 0.600 | 0.0039 |
| 0.00a | 0.00 | 0.82 | - |

a. Made alkaline with sodium hydroxide.

b. Calculated as .

Table 11

Absorbance data for 2,4-dinitrophenol (4 10–5 mol dm–3) in DMSO containing 3-methoxyaniline and its hydrochloride salt at 25°C.

| [An]/mol dm–3 | [AnH+]/mol dm–3 | Abs (430 nm) | K4b |
| --- | --- | --- | --- |
| 0.00 | 0.01 | 0.016 | - |
| 0.10 | 0.01 | 0.135 | 0.017 |
| 0.20 | 0.01 | 0.210 | 0.016 |
| 0.30 | 0.01 | 0.270 | 0.015 |
| 0.40 | 0.01 | 0.307 | 0.014 |
| 0.50 | 0.01 | 0.356 | 0.014 |
| 0.70 | 0.01 | 0.407 | 0.013 |
| 0.00a | 0.00 | 0.831 | - |

a. Made alkaline with sodium hydroxide.

b. Calculated as .

Table 12

Absorbance data for 2,4-dinitrophenol in DMSO containing 4-methylaniline and its hydrochloride salt at 25°C.

| [An]/mol dm–3 | [AnH+]/mol dm–3 | Abs (430 nm) | K4b |
| --- | --- | --- | --- |
| 0.00 | 0.01 | 0.005 | - |
| 0.05 | 0.01 | 0.377 | 0.19 |
| 0.08 | 0.01 | 0.451 | 0.18 |
| 0.10 | 0.01 | 0.492 | 0.18 |
| 0.20 | 0.01 | 0.581 | 0.16 |
| 0.40 | 0.01 | 0.649 | 0.15 |
| 0.60 | 0.01 | 0.676 | 0.14 |
| 0.80 | 0.00 | 0.76 | - |

a. Calculated as .

Table 13

Absorbance data for 2,4-dinitrophenol (4 10–5 mol dm–3) in DMSO containing 4-chloroaniline and its hydrochloride salt at 25°C.

| [An]/mol dm–3 | [AnH+]/mol dm–3 | Abs (430 nm) | K4b |
| --- | --- | --- | --- |
| 0 | 0.001 | 0.008 | - |
| 0.03 | 0.001 | 0.127 | 0.0056 |
| 0.05 | 0.001 | 0.182 | 0.0054 |
| 0.06 | 0.001 | 0.205 | 0.0052 |
| 0.08 | 0.001 | 0.243 | 0.0050 |
| 0.10 | 0.001 | 0.275 | 0.0048 |
| 0.20 | 0.001 | 0.340 | 0.0034 |
| 0.40 | 0.001 | 0.473 | 0.0033 |
| 0.00a | 0.00 | 0.831 | - |

a. Made alkaline with sodium hydroxide.

b. Calculated as .

Table 14

Kinetic data for reaction of DNBFa with *N*-methylaniline, **2b**, in acidic solutions to give **5b**.

| [*N*-methylaniline H+Cl–]/mol dm–3 | [HCl]/mol dm–3 | kobsb/10–4 s–1 | kc/dm3 mol–1 s–1 |
| --- | --- | --- | --- |
| 0.020 | 0.080 | 17 | 9.6 |
| 0.030 | 0.070 | 29 | 10.1 |
| 0.040 | 0.060 | 47 | 11.2 |
| 0.050 | 0.050 | 51 | 8.9 |
| 0.060 | 0.040 | 75 | 9.8 |

a. DNBF concentration is 4 10–5 mol dm–3; solvent is 99:1 (v/v) DMSO:water.

b. Colour forming reaction at 494 nm.

c. Calculated from equation (12) with Ka, 1.15 10–3 mol dm-3 and KH2O, 0.050 mol dm–3.

Table 15

Kinetic data for reaction of DNBFa with *N,N*-dimethylaniline in acidic solutions to give **5c**.

| [*N,N*-Dimethylaniline H+Cl–]/mol dm–3 | [HCl]/mol dm–3 | kobsb/10–4 s–1 | kc/dm3 mol–1 s–1 |
| --- | --- | --- | --- |
| 0.020 | 0.080 | 8.5 | 2.8 |
| 0.030 | 0.070 | 13.2 | 2.6 |
| 0.040 | 0.060 | 17.2 | 2.4 |
| 0.050 | 0.050 | 31.3 | 3.1 |
| 0.060 | 0.040 | 42 | 3.1 |

a. DNBF concentration is 4 10–5 mol dm–3; solvent is 99:1 (v/v) DMSO:water.

b. Colour forming reaction at 486 nm.

c. Calculated from equation (12) with Ka, 2.0 10–3 mol dm–3 and KH2O, 0.050 mol dm–3.

Table 16

Kinetic data for reaction of DNBFa with **2d**, 3-methylaniline in acidic solutions to give **5d**.

| [3-Methylaniline H+Cl–]/mol dm–3 | [HCl]/mol dm–3 | kobsb/10–4 s–1 | kc/dm3 mol–1 s–1 |
| --- | --- | --- | --- |
| 0.010 | 0.090 | 7.2 | 73 |
| 0.020 | 0.080 | 13.7 | 65 |
| 0.030 | 0.070 | 21.5 | 62 |
| 0.040 | 0.060 | 24.6 | 49 |
| 0.050 | 0.050 | 40.6 | 59 |
| 0.060 | 0.040 | 59 | 65 |

a. DNBF concentration is 4 10–5 mol dm–3; solvent is 99:1 (v/v) DMSO:water.

b. Colour forming reaction at 485 nm.

c. Calculated from equation (12) with Ka, 1.38 10–4 mol dm–3 and KH2O, 0.050

mol dm–3.

Table 17

Kinetic data for reaction of DNBFa with 3-methoxyaniline, **2e**, in acidic solutions to give **5e**.

| [3-Methoxyaniline H+Cl–]/mol dm–3 | [HCl]/mol dm–3 | kobsb/s–1 | kc/dm3 mol–1 s–1 |
| --- | --- | --- | --- |
| 0.010 | 0.090 | 0.13 | 3500 |
| 0.020 | 0.080 | 0.22 | 2800 |
| 0.030 | 0.070 | 0.42 | 3300 |
| 0.040 | 0.060 | 0.72 | 3900 |
| 0.050 | 0.050 | 1.14 | 4400 |
| 0.060 | 0.040 | 1.66 | 4800 |

a. DNBF concentration is 2 10–5 mol dm–3; solvent is 99:1 (v/v) DMSO:water.

b. Measured by stopped-flow spectrophotometry at 487 nm.

c. Calculated from equation (12) with Ka, 5.13 10–4 mol dm-3 and KH2O, 0.050 mol dm–3.

Table 18

Kinetic data for reaction of DNBFa with 4-methylaniline, **2f**, in acidic solutions to give **5f**.

| [4-Methylaniline H+Cl–]/mol dm–3 | [HCl]/mol dm–3 | kobsb/10–4 s–1 | kc/dm3 mol–1 s–1 |
| --- | --- | --- | --- |
| 0.040 | 0.060 | 1.09 | 6.5 |
| 0.050 | 0.050 | 1.30 | 5.7 |
| 0.060 | 0.040 | 1.53 | 5.0 |

a. DNBF concentration is 4 10–5 mol dm–3; solvent is 99:1 (v/v) DMSO:water.

b. Colour forming reaction at 485 nm.

c. Calculated from equation (12) with Ka, 4.6 10–5 mol dm–3 and KH2O, 0.050 mol dm–3.

Table 19

Kinetic data for the conversion of **4d** to **5d**

| [3-Methylaniline]a/mol dm–3 | k'obs/10–3 s–1 | KNb/dm3 mol–1 |
| --- | --- | --- |
| 0.04 | 5.16 | 30000 |
| 0.07 | 2.64 | 33500 |
| 0.10 | 2.20 | 28000 |
| 0.20 | 1.10 | 28000 |

a. All solutions contain 3-methylaniline hydrochloride, 0.1 mol dm–3.

b. Calculated from equation (14) with k 62 dm3 mol–1 s–1.

Table 20

Kinetic data for the conversion of **4e** to **5e**

| [3-Methoxyaniline]a/mol dm–3 | k'obs/s–1 | KNb/dm3 mol–1 |
| --- | --- | --- |
| 0.04 | 2.88 | 3300 |
| 0.07 | 1.35 | 4000 |
| 0.10 | 1.14 | 3300 |
| 0.20 | 0.56 | 3400 |

a. All solutions contain 3-methoxyaniline hydrochloride, 0.1 mol dm–3.

b. Calculated from equation (14) with k 3800 dm3 mol–1 s–1.

Table 21

Kinetic data for the conversion of **4f** to **5f**

| [4-Methylaniline]a/mol dm–3 | k'obs/10–4 s–1 | KNb/dm3 mol–1 |
| --- | --- | --- |
| 0.04 | 3.4 | 42,000 |
| 0.07 | 2.3 | 35,000 |
| 0.10 | 1.8 | 32,000 |
| 0.20 | 0.8 | 36,000 |

a. All solutions contain 4-methylaniline hydrochloride, 0.1 mol dm–3.

b. Calculated from equation (14) with k 5.7 dm3 mol–1 s–1.
